# Supplementary material for: Cross-classification between self-rated health and health status: longitudinal analyses of all-cause mortality and leading causes of death in the UK
Source: PubMed Central journal article supplement (PMC8748682; doi:10.1038/s41598-021-04016-x), 2022-01-10
Supplement: 41598_2021_4016_MOESM1_ESM.pdf [file 41598_2021_4016_MOESM1_ESM.pdf]

## Supplementary material

---

The following material accompanies the article:

### **Cross-classification between self-rated health and health status: longitudinal analyses of all-cause mortality and leading causes of death in the UK**

Julian Mutz<sup>1\*</sup> and Cathryn M. Lewis<sup>1,2</sup>

Affiliations:

1. Social, Genetic and Developmental Psychiatry Centre, Institute of Psychiatry, Psychology & Neuroscience, King's College London, London, United Kingdom
2. Department of Medical and Molecular Genetics, Faculty of Life Sciences & Medicine, King's College London, London, United Kingdom

## Supplement 1: Hypotheses

### Full health cross-classification

Full health cross-classification

| Health status | Self-rated health |      |      |           |
|---------------|-------------------|------|------|-----------|
|               | Poor              | Fair | Good | Excellent |
| Favourable    | ?                 | ?    | ↑    | ↑↑        |
| Unfavourable  | ↓↓                | ↓    | ?    | ?         |

### Simplified health cross-classification

Simplified health cross-classification

| Health status | Self-rated health |                |
|---------------|-------------------|----------------|
|               | Poor/Fair         | Good/Excellent |
| Favourable    | ?                 | ↑              |
| Unfavourable  | ↓                 | ?              |

## Supplement 2: Additional results

Supplement figure 1. Study population

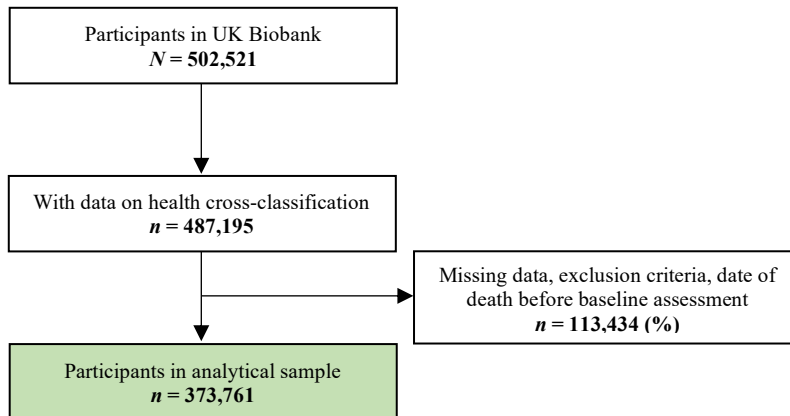

Supplement figure 1. Flowchart of study sample.

Supplement table 1. Sample characteristics

| <b>Supplement table 1. Sample characteristics</b> |                        |                              |
|---------------------------------------------------|------------------------|------------------------------|
|                                                   | Full sample (N=502521) | Analytical sample (N=373761) |
| <b>Age</b>                                        |                        |                              |
| Mean (SD)                                         | 56.53 (8.10)           | 56.02 (8.08)                 |
| <b>Sex</b>                                        |                        |                              |
| Female                                            | 273394 (54.4%)         | 193541 (51.8%)               |
| Male                                              | 229127 (45.6%)         | 180220 (48.2%)               |
| <b>Ethnicity</b>                                  |                        |                              |
| White                                             | 472711 (94.1%)         | 357509 (95.7%)               |
| Mixed-race                                        | 2958 (0.6%)            | 2117 (0.6%)                  |
| Black                                             | 8061 (1.6%)            | 4877 (1.3%)                  |
| Asian                                             | 9882 (2.0%)            | 5551 (1.5%)                  |
| Chinese                                           | 1574 (0.3%)            | 1023 (0.3%)                  |
| Other                                             | 4558 (0.9%)            | 2684 (0.7%)                  |
| Prefer not to answer                              | 1662 (0.3%)            |                              |
| Do not know                                       | 217 (0.0%)             |                              |
| Missing                                           | 898 (0.2%)             |                              |
| <b>Highest qualification<sup>1</sup></b>          |                        |                              |
| None                                              | 85274 (17.0%)          | 49621 (13.3%)                |
| O levels/GCSEs/CSEs                               | 132086 (26.3%)         | 99810 (26.7%)                |
| A levels/NVQ/HND/HNC <sup>1</sup>                 | 113859 (22.7%)         | 88033 (23.6%)                |
| Degree                                            | 161168 (32.1%)         | 136297 (36.5%)               |
| Prefer not to answer                              | 5493 (1.1%)            |                              |
| Missing                                           | 4641 (0.9%)            |                              |
| <b>Household income<sup>2</sup></b>               |                        |                              |
| Very low                                          | 97205 (19.3%)          | 78241 (20.9%)                |
| Low                                               | 108177 (21.5%)         | 94386 (25.3%)                |
| Medium                                            | 110774 (22.0%)         | 99882 (26.7%)                |
| High                                              | 86269 (17.2%)          | 79742 (21.3%)                |
| Very high                                         | 22930 (4.6%)           | 21510 (5.8%)                 |
| Prefer not to answer                              | 49848 (9.9%)           |                              |
| Do not know                                       | 21305 (4.2%)           |                              |
| Missing                                           | 6013 (1.2%)            |                              |
| <b>Walking (days/week)<sup>3</sup></b>            |                        |                              |
| Mean (SD)                                         | 5.39 (1.93)            | 5.36 (1.95)                  |
| Prefer not to answer                              | 979 (0.19%)            |                              |
| Do not know                                       | 6687 (1.33%)           |                              |
| Unable to walk                                    | 1929 (0.38%)           |                              |
| Missing                                           | 874 (0.17%)            |                              |
| <b>Moderate activity (days/week)<sup>3</sup></b>  |                        |                              |
| Mean (SD)                                         | 3.63 (2.33)            | 3.57 (2.33)                  |
| Prefer not to answer                              | 2273 (0.45%)           |                              |
| Do not know                                       | 24120 (4.8%)           |                              |
| Missing                                           | 878 (0.17%)            |                              |
| <b>Vigorous activity (days/week)<sup>3</sup></b>  |                        |                              |
| Mean (SD)                                         | 1.84 (1.96)            | 1.86 (1.94)                  |
| Prefer not to answer                              | 4116 (0.82%)           |                              |
| Do not know                                       | 22582 (4.49%)          |                              |
| Missing                                           | 878 (0.17%)            |                              |
| <b>Smoking status</b>                             |                        |                              |
| Never                                             | 273528 (54.4%)         | 204457 (54.7%)               |
| Former                                            | 173064 (34.4%)         | 131186 (35.1%)               |
| Current                                           | 52979 (10.5%)          | 38118 (10.2%)                |
| Prefer not to answer                              | 2059 (0.4%)            |                              |
| Missing                                           | 891 (0.2%)             |                              |
| <b>Alcohol intake frequency</b>                   |                        |                              |
| Never                                             | 40645 (8.1%)           | 25358 (6.8%)                 |
| Special occasions                                 | 58011 (11.5%)          | 38719 (10.4%)                |
| 1-3/month                                         | 55856 (11.1%)          | 41310 (11.1%)                |
| 1-2/week                                          | 129294 (25.7%)         | 96316 (25.8%)                |
| 3-4/week                                          | 115443 (23.0%)         | 91046 (24.4%)                |
| Daily/almost daily                                | 101770 (20.3%)         | 81012 (21.7%)                |
| Prefer not to answer                              | 605 (0.1%)             |                              |
| Missing                                           | 897 (0.2%)             |                              |

Note: SD = standard deviation; GCSEs = general certificate of secondary education; CSE = certificate of secondary education; NVQ = national vocational qualification; HND = higher national diploma; HNC = higher national certificate. <sup>1</sup>also includes 'other professional qualifications'. <sup>2</sup>Annual household income groups: very low (<£18 000), low (£18 000–30 999), middle (£31 000–51 999), high (£52 000–100 000) and very high (>£100 000). <sup>3</sup>number of days per week engaging in these activities for 10+ minutes continuously.

Supplement table 2. Average number of illnesses

**Supplement table 2.** Number of illnesses by health cross-classification

| Self-rated health | Health status | Mean | SD   |
|-------------------|---------------|------|------|
| Excellent         | Favourable    | 0.73 | 0.99 |
| Good              | Favourable    | 1.19 | 1.27 |
| Excellent         | Unfavourable  | 2.26 | 1.43 |
| Fair              | Favourable    | 1.80 | 1.54 |
| Good              | Unfavourable  | 2.88 | 1.70 |
| Poor              | Favourable    | 2.52 | 1.81 |
| Fair              | Unfavourable  | 3.73 | 2.09 |
| Poor              | Unfavourable  | 4.93 | 2.70 |

Note: SD = standard deviation.

Supplement figure 2. Number of illnesses by health cross-classification

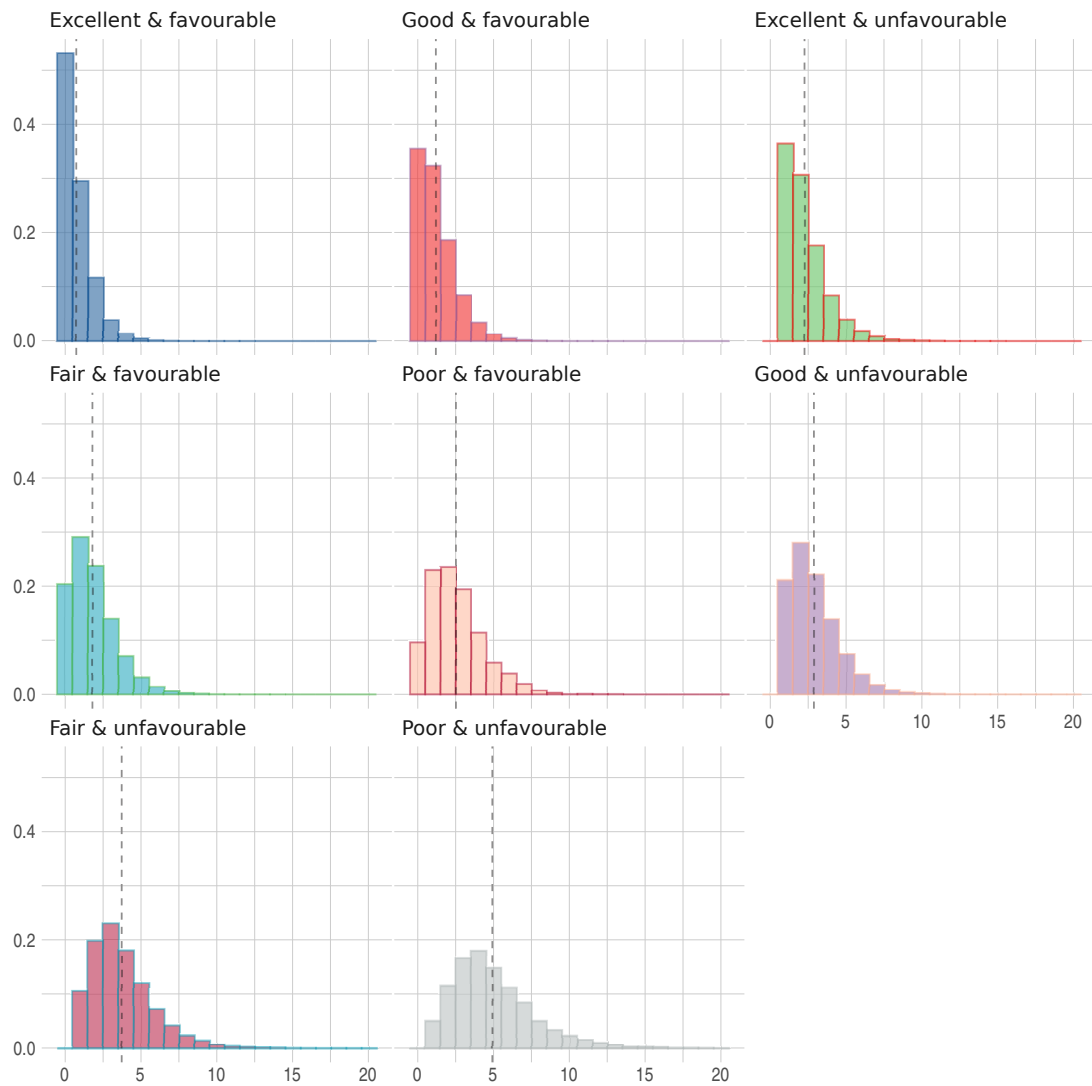

**Supplement figure 2.** Number of illnesses by health cross-classification. 9 observations were above graph maximum of 20 illnesses (5 poor & unfavourable, 3 fair & unfavourable and 1 excellent & unfavourable).

Supplement figure 3. Non-cancer illnesses

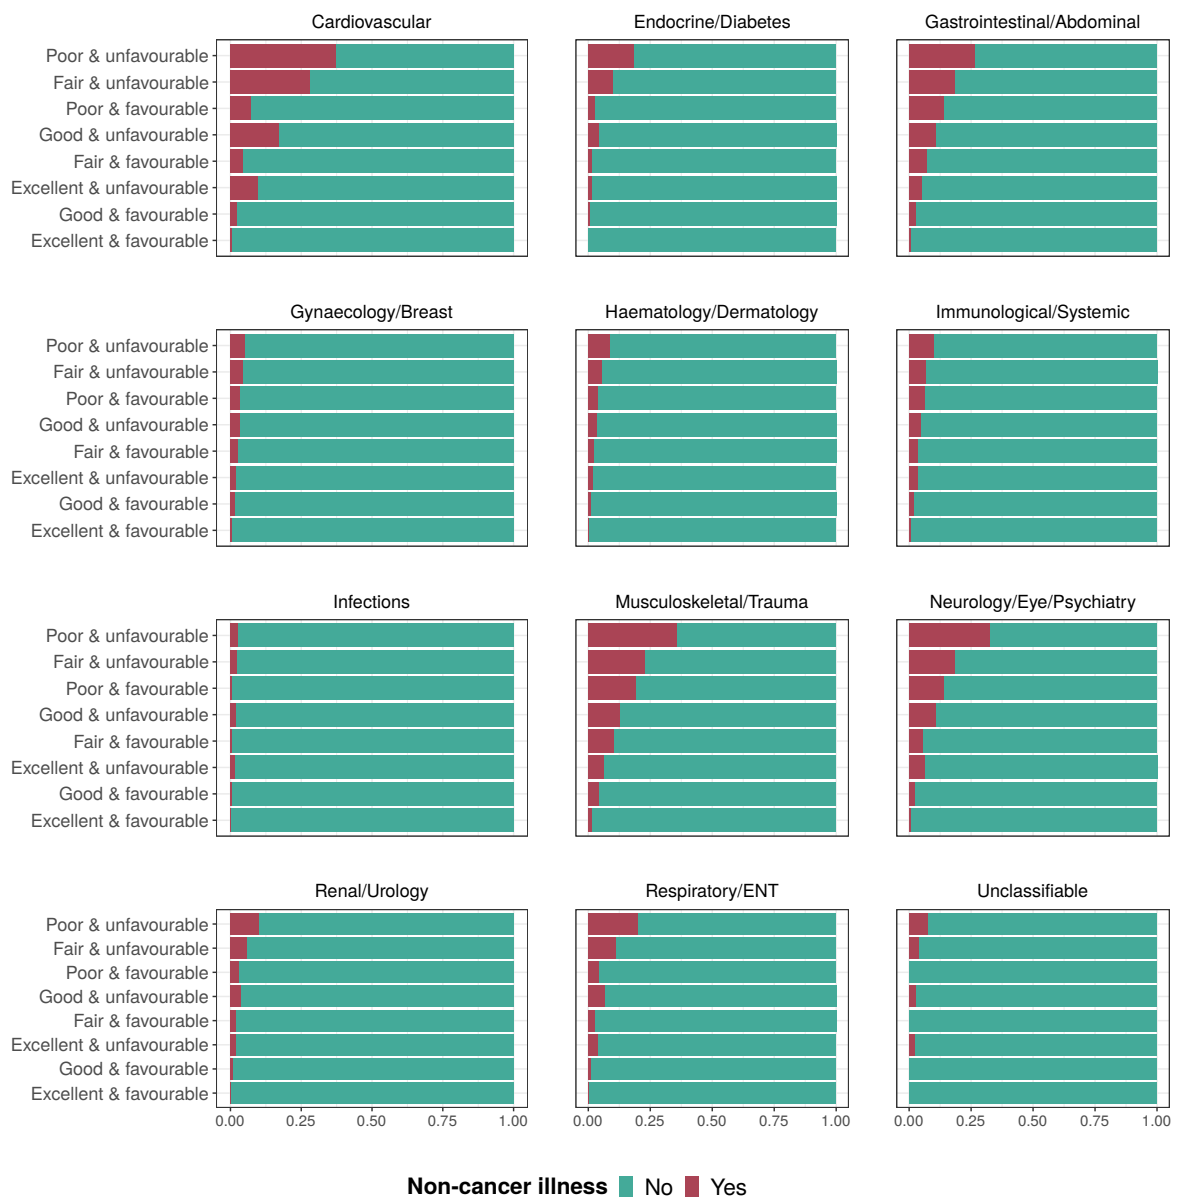

Supplement figure 3. Non-cancer illnesses by health cross-classification. Proportions represent individuals with at least one non-cancer illness within each broader illness group.

Supplement figure 4. Cancer illnesses

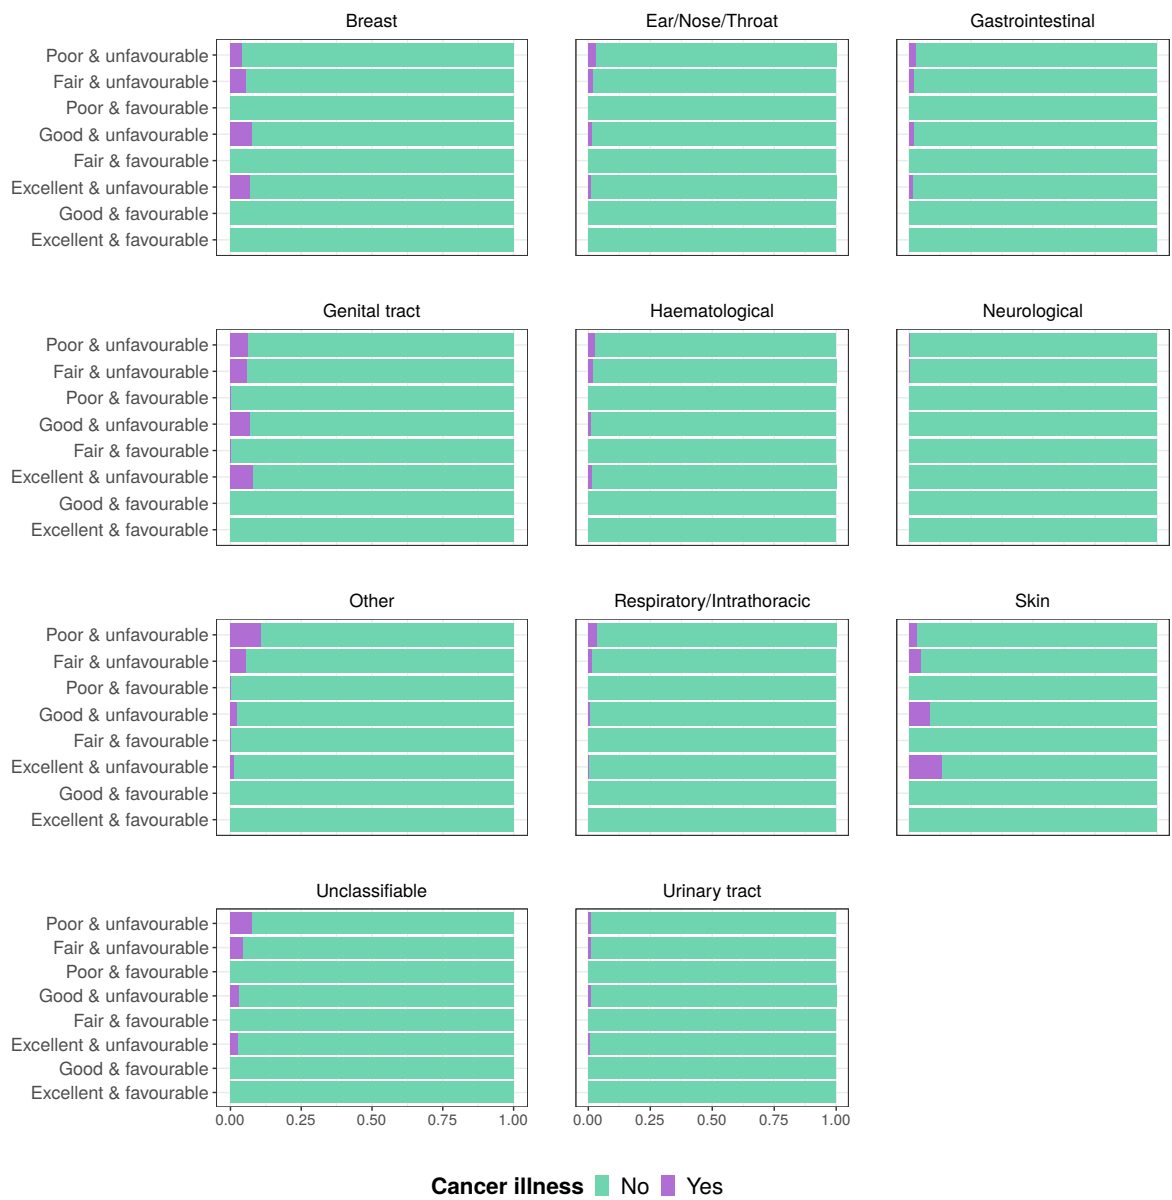

Supplement figure 4. Cancer illnesses by health cross-classification. Proportions represent individuals with at least one cancer illness within each broader illness group.



Supplement table 3. Hazard ratios health status and all-cause mortality

| <b>Supplement table 3.</b> Cox proportional hazards model: health status and all-cause mortality |         |        |      |         |        |      |         |        |      |
|--------------------------------------------------------------------------------------------------|---------|--------|------|---------|--------|------|---------|--------|------|
| Health status                                                                                    | Model 1 |        |      | Model 2 |        |      | Model 3 |        |      |
|                                                                                                  | HR      | 95% CI |      | HR      | 95% CI |      | HR      | 95% CI |      |
| Healthy                                                                                          | Ref     | -      | -    | Ref     | -      | -    | Ref     | -      | -    |
| Unhealthy                                                                                        | 2.05    | 1.99   | 2.10 | 1.94    | 1.89   | 1.99 | 1.85    | 1.80   | 1.90 |

*Note:* HR = hazard ratio; CI = confidence interval. Model 1 – unadjusted; Model 2 – adjusted for sociodemographic characteristics; Model 3 – additionally adjusted for lifestyle factors. All Bonferroni-adjusted *P*-values < 0.001.

Supplement table 4. Hazard ratios self-rated health and all-cause mortality

| <b>Supplement table 4.</b> Cox proportional hazards model: self-rated health and all-cause mortality |         |        |      |         |        |      |         |        |      |
|------------------------------------------------------------------------------------------------------|---------|--------|------|---------|--------|------|---------|--------|------|
| Health status                                                                                        | Model 1 |        |      | Model 2 |        |      | Model 3 |        |      |
|                                                                                                      | HR      | 95% CI |      | HR      | 95% CI |      | HR      | 95% CI |      |
| Excellent                                                                                            | Ref     | -      | -    | Ref     | -      | -    | Ref     | -      | -    |
| Good                                                                                                 | 1.32    | 1.27   | 1.39 | 1.30    | 1.25   | 1.36 | 1.25    | 1.20   | 1.31 |
| Fair                                                                                                 | 2.47    | 2.36   | 2.59 | 2.31    | 2.20   | 2.42 | 2.07    | 1.97   | 2.18 |
| Poor                                                                                                 | 5.79    | 5.47   | 6.12 | 5.17    | 4.88   | 5.48 | 4.25    | 4.00   | 4.51 |

*Note:* HR = hazard ratio; CI = confidence interval. Model 1 – unadjusted; Model 2 – adjusted for sociodemographic characteristics; Model 3 – additionally adjusted for lifestyle factors. All Bonferroni-adjusted *P*-values < 0.001.

Supplement figure 5. Model 3 Cox PH survival probabilities

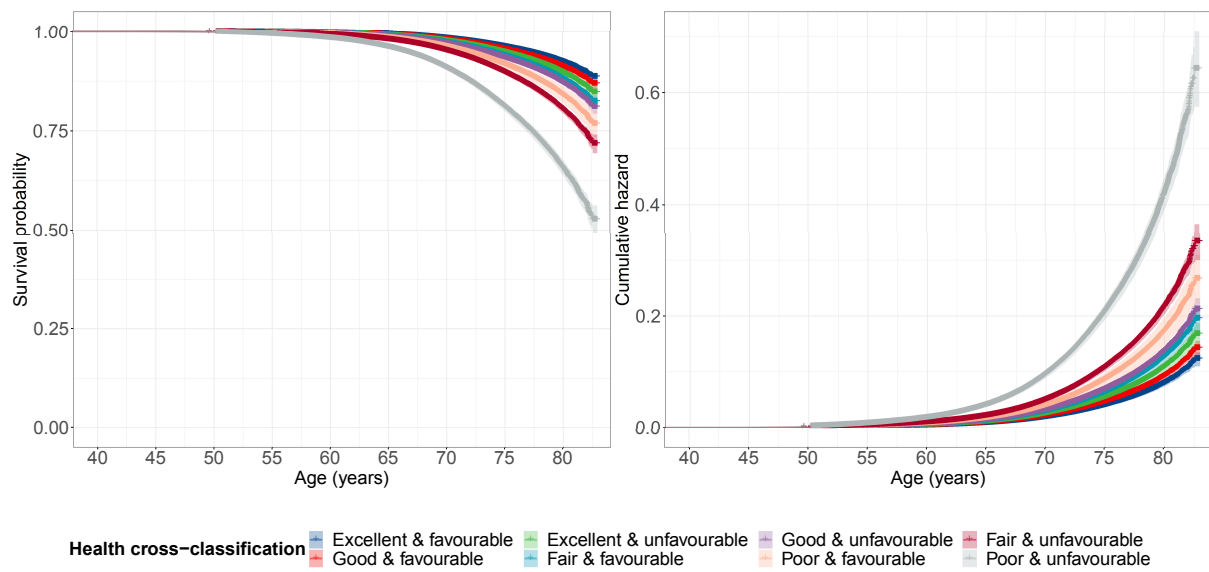

**Supplement figure 5.** Cox proportional hazard survival probabilities and cumulative hazards for all-cause mortality. Estimates from Model 3 adjusted for sex, ethnicity, highest qualification, household income, smoking status, alcohol intake and physical activity. 89 observations were above graph maximum of age 83. Figures show continuous covariates fixed at their mean value and categorical covariates fixed at the largest group.

Supplement figure 6. Survival curves cause-specific mortality

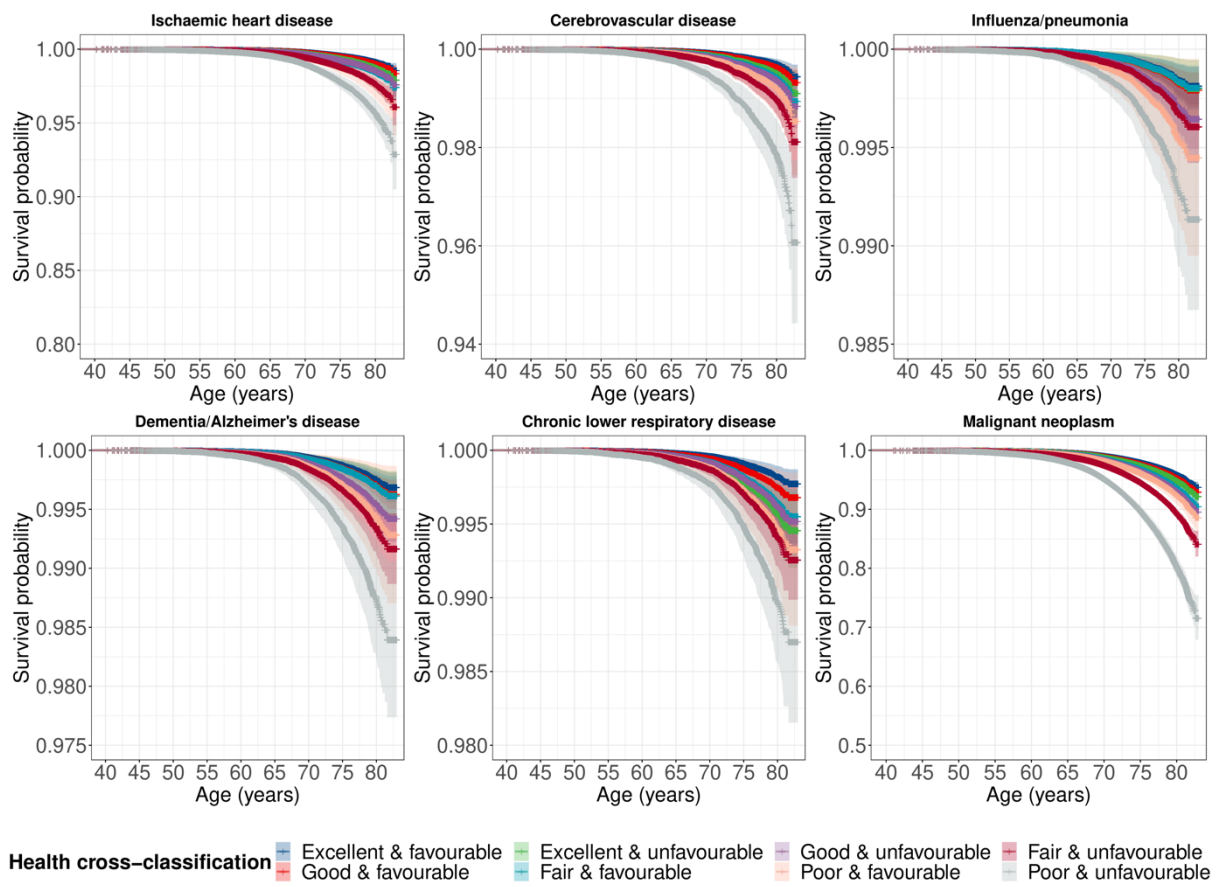

Supplement figure 6. Cox proportional hazard survival curves for cause-specific mortality.

Supplement table 5. Hazard ratios cause specific mortality

Results presented below correspond to Table 3 presented in the main body of the text but also include *p*-values. Results for which Bonferroni and Benjamini & Hochberg adjusted *p*-values differ are highlighted.

| <b>Supplement table 5. Cox proportional hazards model: cause-specific mortality</b> |              |         |            |                           |                        |         |            |                           |                        |         |            |                           |                        |  |
|-------------------------------------------------------------------------------------|--------------|---------|------------|---------------------------|------------------------|---------|------------|---------------------------|------------------------|---------|------------|---------------------------|------------------------|--|
|                                                                                     |              | Model 1 |            |                           |                        | Model 2 |            |                           |                        | Model 3 |            |                           |                        |  |
| Term                                                                                |              | HR      | 95% CI     | <i>p</i> <sub>Bonf.</sub> | <i>p</i> <sub>BH</sub> | HR      | 95% CI     | <i>p</i> <sub>Bonf.</sub> | <i>p</i> <sub>BH</sub> | HR      | 95% CI     | <i>p</i> <sub>Bonf.</sub> | <i>p</i> <sub>BH</sub> |  |
| <b>Ischaemic heart disease</b>                                                      |              |         |            |                           |                        |         |            |                           |                        |         |            |                           |                        |  |
| Excellent                                                                           | Favourable   | Ref     | -          | -                         | -                      | Ref     | -          | -                         | -                      | Ref     | -          | -                         | -                      |  |
| Good                                                                                | Favourable   | 1.21    | 1.02 1.43  | 0.557                     | 0.029                  | 1.19    | 1.01 1.41  | 0.889                     | 0.044                  | 1.14    | 0.96 1.35  | >0.999                    | 0.122                  |  |
| Excellent                                                                           | Unfavourable | 1.51    | 1.16 1.98  | 0.054                     | 0.003                  | 1.47    | 1.12 1.92  | 0.105                     | 0.006                  | 1.45    | 1.11 1.90  | 0.135                     | 0.007                  |  |
| Fair                                                                                | Favourable   | 2.16    | 1.77 2.63  | <0.001                    | <0.001                 | 2.03    | 1.66 2.48  | <0.001                    | <0.001                 | 1.81    | 1.48 2.21  | <0.001                    | <0.001                 |  |
| Good                                                                                | Unfavourable | 1.84    | 1.55 2.18  | <0.001                    | <0.001                 | 1.77    | 1.49 2.10  | <0.001                    | <0.001                 | 1.68    | 1.42 2.00  | <0.001                    | <0.001                 |  |
| Poor                                                                                | Favourable   | 3.71    | 2.53 5.43  | <0.001                    | <0.001                 | 3.44    | 2.35 5.05  | <0.001                    | <0.001                 | 2.81    | 1.91 4.14  | <0.001                    | <0.001                 |  |
| Fair                                                                                | Unfavourable | 3.38    | 2.85 4.01  | <0.001                    | <0.001                 | 3.10    | 2.60 3.68  | <0.001                    | <0.001                 | 2.76    | 2.32 3.29  | <0.001                    | <0.001                 |  |
| Poor                                                                                | Unfavourable | 7.14    | 5.90 8.66  | <0.001                    | <0.001                 | 6.28    | 5.16 7.64  | <0.001                    | <0.001                 | 5.11    | 4.17 6.26  | <0.001                    | <0.001                 |  |
| <b>Cerebrovascular diseases</b>                                                     |              |         |            |                           |                        |         |            |                           |                        |         |            |                           |                        |  |
| Excellent                                                                           | Favourable   | Ref     | -          | -                         | -                      | Ref     | -          | -                         | -                      | Ref     | -          | -                         | -                      |  |
| Good                                                                                | Favourable   | 1.25    | 0.94 1.66  | >0.999                    | 0.140                  | 1.25    | 0.94 1.67  | >0.999                    | 0.140                  | 1.22    | 0.91 1.62  | >0.999                    | 0.186                  |  |
| Excellent                                                                           | Unfavourable | 1.67    | 1.06 2.61  | 0.550                     | 0.034                  | 1.63    | 1.04 2.55  | 0.710                     | 0.042                  | 1.61    | 1.03 2.53  | 0.782                     | 0.043                  |  |
| Fair                                                                                | Favourable   | 2.13    | 1.52 3.00  | <0.001                    | <0.001                 | 2.09    | 1.48 2.95  | 0.001                     | <0.001                 | 1.90    | 1.34 2.69  | 0.006                     | 0.001                  |  |
| Good                                                                                | Unfavourable | 2.20    | 1.65 2.94  | <0.001                    | <0.001                 | 2.16    | 1.62 2.89  | <0.001                    | <0.001                 | 2.09    | 1.56 2.79  | <0.001                    | <0.001                 |  |
| Poor                                                                                | Favourable   | 3.24    | 1.61 6.54  | 0.022                     | 0.002                  | 3.16    | 1.56 6.39  | 0.029                     | 0.002                  | 2.64    | 1.30 5.36  | 0.150                     | 0.010                  |  |
| Fair                                                                                | Unfavourable | 3.91    | 2.92 5.22  | <0.001                    | <0.001                 | 3.73    | 2.78 5.00  | <0.001                    | <0.001                 | 3.41    | 2.53 4.59  | <0.001                    | <0.001                 |  |
| Poor                                                                                | Unfavourable | 9.49    | 6.93 13.01 | <0.001                    | <0.001                 | 8.74    | 6.34 12.07 | <0.001                    | <0.001                 | 7.19    | 5.15 10.03 | <0.001                    | <0.001                 |  |
| <b>Influenza/pneumonia</b>                                                          |              |         |            |                           |                        |         |            |                           |                        |         |            |                           |                        |  |
| Excellent                                                                           | Favourable   | Ref     | -          | -                         | -                      | Ref     | -          | -                         | -                      | Ref     | -          | -                         | -                      |  |
| Good                                                                                | Favourable   | 1.22    | 0.82 1.82  | >0.999                    | 0.483                  | 1.17    | 0.79 1.75  | >0.999                    | 0.604                  | 1.11    | 0.75 1.66  | >0.999                    | 0.740                  |  |
| Excellent                                                                           | Unfavourable | 1.13    | 0.55 2.30  | >0.999                    | 0.857                  | 1.09    | 0.53 2.22  | >0.999                    | 0.857                  | 1.07    | 0.52 2.19  | >0.999                    | 0.857                  |  |
| Fair                                                                                | Favourable   | 1.32    | 0.77 2.25  | >0.999                    | 0.483                  | 1.19    | 0.70 2.04  | >0.999                    | 0.684                  | 1.05    | 0.61 1.80  | >0.999                    | 0.857                  |  |
| Good                                                                                | Unfavourable | 2.17    | 1.46 3.24  | 0.003                     | <0.001                 | 2.02    | 1.35 3.02  | 0.012                     | 0.002                  | 1.90    | 1.27 2.84  | 0.037                     | 0.004                  |  |
| Poor                                                                                | Favourable   | 4.13    | 1.72 9.91  | 0.031                     | 0.003                  | 3.63    | 1.51 8.74  | 0.085                     | 0.008                  | 2.96    | 1.22 7.18  | 0.339                     | 0.028                  |  |
| Fair                                                                                | Unfavourable | 2.74    | 1.80 4.17  | <0.001                    | <0.001                 | 2.40    | 1.57 3.66  | 0.001                     | <0.001                 | 2.12    | 1.38 3.25  | 0.013                     | 0.002                  |  |
| Poor                                                                                | Unfavourable | 6.92    | 4.36 10.98 | <0.001                    | <0.001                 | 5.71    | 3.56 9.15  | <0.001                    | <0.001                 | 4.66    | 2.86 7.58  | <0.001                    | <0.001                 |  |
| <b>Dementia/Alzheimer's disease</b>                                                 |              |         |            |                           |                        |         |            |                           |                        |         |            |                           |                        |  |
| Excellent                                                                           | Favourable   | Ref     | -          | -                         | -                      | Ref     | -          | -                         | -                      | Ref     | -          | -                         | -                      |  |
| Good                                                                                | Favourable   | 1.25    | 0.92 1.70  | >0.999                    | 0.219                  | 1.24    | 0.91 1.68  | >0.999                    | 0.230                  | 1.19    | 0.87 1.62  | >0.999                    | 0.337                  |  |
| Excellent                                                                           | Unfavourable | 1.28    | 0.76 2.17  | >0.999                    | 0.392                  | 1.24    | 0.73 2.10  | >0.999                    | 0.440                  | 1.23    | 0.72 2.07  | >0.999                    | 0.447                  |  |
| Fair                                                                                | Favourable   | 1.44    | 0.96 2.15  | >0.999                    | 0.121                  | 1.38    | 0.92 2.06  | >0.999                    | 0.179                  | 1.23    | 0.82 1.85  | >0.999                    | 0.363                  |  |
| Good                                                                                | Unfavourable | 2.02    | 1.48 2.75  | <0.001                    | <0.001                 | 1.95    | 1.43 2.66  | 0.001                     | <0.001                 | 1.85    | 1.35 2.53  | 0.003                     | <0.001                 |  |
| Poor                                                                                | Favourable   | 2.87    | 1.30 6.32  | 0.186                     | 0.019                  | 2.79    | 1.26 6.16  | 0.235                     | 0.021                  | 2.29    | 1.03 5.09  | 0.861                     | 0.072                  |  |
| Fair                                                                                | Unfavourable | 3.22    | 2.34 4.41  | <0.001                    | <0.001                 | 3.00    | 2.18 4.13  | <0.001                    | <0.001                 | 2.67    | 1.93 3.70  | <0.001                    | <0.001                 |  |
| Poor                                                                                | Unfavourable | 7.00    | 4.91 9.99  | <0.001                    | <0.001                 | 6.35    | 4.42 9.14  | <0.001                    | <0.001                 | 5.16    | 3.54 7.51  | <0.001                    | <0.001                 |  |
| <b>Chronic lower respiratory disease</b>                                            |              |         |            |                           |                        |         |            |                           |                        |         |            |                           |                        |  |
| Excellent                                                                           | Favourable   | Ref     | -          | -                         | -                      | Ref     | -          | -                         | -                      | Ref     | -          | -                         | -                      |  |
| Good                                                                                | Favourable   | 1.50    | 1.07 2.09  | 0.382                     | 0.020                  | 1.46    | 1.04 2.04  | 0.584                     | 0.029                  | 1.42    | 1.01 1.98  | 0.904                     | 0.043                  |  |
| Excellent                                                                           | Unfavourable | 2.52    | 1.58 4.03  | 0.002                     | <0.001                 | 2.46    | 1.54 3.94  | 0.003                     | <0.001                 | 2.41    | 1.51 3.86  | 0.005                     | <0.001                 |  |
| Fair                                                                                | Favourable   | 2.38    | 1.60 3.54  | <0.001                    | <0.001                 | 2.19    | 1.47 3.26  | 0.002                     | <0.001                 | 1.99    | 1.33 2.97  | 0.017                     | 0.001                  |  |
| Good                                                                                | Unfavourable | 2.35    | 1.67 3.31  | <0.001                    | <0.001                 | 2.25    | 1.60 3.16  | <0.001                    | <0.001                 | 2.14    | 1.52 3.01  | <0.001                    | <0.001                 |  |
| Poor                                                                                | Favourable   | 4.01    | 1.88 8.55  | 0.007                     | <0.001                 | 3.58    | 1.68 7.65  | 0.021                     | 0.001                  | 2.99    | 1.39 6.41  | 0.104                     | 0.006                  |  |
| Fair                                                                                | Unfavourable | 4.09    | 2.90 5.76  | <0.001                    | <0.001                 | 3.68    | 2.60 5.21  | <0.001                    | <0.001                 | 3.30    | 2.33 4.69  | <0.001                    | <0.001                 |  |
| Poor                                                                                | Unfavourable | 8.10    | 5.51 11.90 | <0.001                    | <0.001                 | 6.96    | 4.71 10.31 | <0.001                    | <0.001                 | 5.80    | 3.87 8.68  | <0.001                    | <0.001                 |  |
| <b>Malignant neoplasm</b>                                                           |              |         |            |                           |                        |         |            |                           |                        |         |            |                           |                        |  |
| Excellent                                                                           | Favourable   | Ref     | -          | -                         | -                      | Ref     | -          | -                         | -                      | Ref     | -          | -                         | -                      |  |
| Good                                                                                | Favourable   | 1.19    | 1.10 1.29  | <0.001                    | <0.001                 | 1.18    | 1.09 1.27  | <0.001                    | <0.001                 | 1.14    | 1.06 1.23  | 0.016                     | 0.001                  |  |
| Excellent                                                                           | Unfavourable | 1.31    | 1.15 1.49  | 0.001                     | <0.001                 | 1.27    | 1.12 1.45  | 0.006                     | <0.001                 | 1.26    | 1.11 1.44  | 0.009                     | <0.001                 |  |
| Fair                                                                                | Favourable   | 1.81    | 1.65 1.99  | <0.001                    | <0.001                 | 1.72    | 1.57 1.89  | <0.001                    | <0.001                 | 1.55    | 1.41 1.71  | <0.001                    | <0.001                 |  |
| Good                                                                                | Unfavourable | 1.84    | 1.70 1.99  | <0.001                    | <0.001                 | 1.78    | 1.65 1.93  | <0.001                    | <0.001                 | 1.71    | 1.58 1.85  | <0.001                    | <0.001                 |  |
| Poor                                                                                | Favourable   | 2.40    | 1.94 2.96  | <0.001                    | <0.001                 | 2.25    | 1.82 2.79  | <0.001                    | <0.001                 | 1.88    | 1.52 2.33  | <0.001                    | <0.001                 |  |
| Fair                                                                                | Unfavourable | 3.20    | 2.96 3.46  | <0.001                    | <0.001                 | 2.96    | 2.74 3.21  | <0.001                    | <0.001                 | 2.68    | 2.48 2.91  | <0.001                    | <0.001                 |  |
| Poor                                                                                | Unfavourable | 7.02    | 6.43 7.67  | <0.001                    | <0.001                 | 6.24    | 5.70 6.83  | <0.001                    | <0.001                 | 5.20    | 4.73 5.71  | <0.001                    | <0.001                 |  |

Note: HR = hazard ratio; CI = confidence interval; Bonf. = Bonferroni; BH = Benjamini & Hochberg. Model 1 – unadjusted; Model 2 – adjusted for sociodemographic characteristics; Model 3 – additionally adjusted for lifestyle factors.

Supplement table 6. Hazard ratios all-cause mortality stratified by sex

| <b>Supplement table 6.</b> Cox proportional hazards model: all-cause mortality stratified by sex |              |         |        |      |                           |                        |      |        |      |                           |                        |      |        |      |                           |                        |
|--------------------------------------------------------------------------------------------------|--------------|---------|--------|------|---------------------------|------------------------|------|--------|------|---------------------------|------------------------|------|--------|------|---------------------------|------------------------|
|                                                                                                  |              | Model 1 |        |      |                           | Model 2                |      |        |      | Model 3                   |                        |      |        |      |                           |                        |
| Term                                                                                             |              | HR      | 95% CI |      | <i>p</i> <sub>Bonf.</sub> | <i>p</i> <sub>BH</sub> | HR   | 95% CI |      | <i>p</i> <sub>Bonf.</sub> | <i>p</i> <sub>BH</sub> | HR   | 95% CI |      | <i>p</i> <sub>Bonf.</sub> | <i>p</i> <sub>BH</sub> |
| <b>Males</b>                                                                                     |              |         |        |      |                           |                        |      |        |      |                           |                        |      |        |      |                           |                        |
| Excellent                                                                                        | Favourable   | Ref     | -      | -    | -                         | -                      | Ref  | -      | -    | -                         | -                      | Ref  | -      | -    | -                         | -                      |
| Good                                                                                             | Favourable   | 1.25    | 1.17   | 1.35 | <0.001                    | <0.001                 | 1.23 | 1.14   | 1.32 | <0.001                    | <0.001                 | 1.19 | 1.10   | 1.28 | <0.001                    | <0.001                 |
| Excellent                                                                                        | Unfavourable | 1.36    | 1.21   | 1.52 | <0.001                    | <0.001                 | 1.34 | 1.19   | 1.50 | <0.001                    | <0.001                 | 1.32 | 1.18   | 1.49 | <0.001                    | <0.001                 |
| Fair                                                                                             | Favourable   | 1.92    | 1.76   | 2.09 | <0.001                    | <0.001                 | 1.82 | 1.66   | 1.98 | <0.001                    | <0.001                 | 1.65 | 1.51   | 1.80 | <0.001                    | <0.001                 |
| Good                                                                                             | Unfavourable | 1.79    | 1.66   | 1.92 | <0.001                    | <0.001                 | 1.73 | 1.61   | 1.86 | <0.001                    | <0.001                 | 1.67 | 1.55   | 1.80 | <0.001                    | <0.001                 |
| Poor                                                                                             | Favourable   | 3.32    | 2.79   | 3.95 | <0.001                    | <0.001                 | 3.00 | 2.52   | 3.57 | <0.001                    | <0.001                 | 2.53 | 2.13   | 3.02 | <0.001                    | <0.001                 |
| Fair                                                                                             | Unfavourable | 3.08    | 2.86   | 3.31 | <0.001                    | <0.001                 | 2.88 | 2.67   | 3.10 | <0.001                    | <0.001                 | 2.64 | 2.45   | 2.85 | <0.001                    | <0.001                 |
| Poor                                                                                             | Unfavourable | 6.86    | 6.33   | 7.43 | <0.001                    | <0.001                 | 6.16 | 5.67   | 6.68 | <0.001                    | <0.001                 | 5.25 | 4.83   | 5.72 | <0.001                    | <0.001                 |
| <b>Females</b>                                                                                   |              |         |        |      |                           |                        |      |        |      |                           |                        |      |        |      |                           |                        |
| Excellent                                                                                        | Favourable   | Ref     | -      | -    | -                         | -                      | Ref  | -      | -    | -                         | -                      | Ref  | -      | -    | -                         | -                      |
| Good                                                                                             | Favourable   | 1.17    | 1.08   | 1.28 | 0.005                     | <0.001                 | 1.18 | 1.08   | 1.28 | 0.004                     | <0.001                 | 1.13 | 1.04   | 1.23 | 0.104                     | 0.005                  |
| Excellent                                                                                        | Unfavourable | 1.45    | 1.25   | 1.67 | <0.001                    | <0.001                 | 1.45 | 1.25   | 1.67 | <0.001                    | <0.001                 | 1.44 | 1.24   | 1.66 | <0.001                    | <0.001                 |
| Fair                                                                                             | Favourable   | 1.70    | 1.52   | 1.89 | <0.001                    | <0.001                 | 1.69 | 1.52   | 1.89 | <0.001                    | <0.001                 | 1.50 | 1.34   | 1.67 | <0.001                    | <0.001                 |
| Good                                                                                             | Unfavourable | 1.93    | 1.77   | 2.11 | <0.001                    | <0.001                 | 1.93 | 1.77   | 2.11 | <0.001                    | <0.001                 | 1.83 | 1.68   | 2.00 | <0.001                    | <0.001                 |
| Poor                                                                                             | Favourable   | 2.07    | 1.61   | 2.66 | <0.001                    | <0.001                 | 2.06 | 1.60   | 2.64 | <0.001                    | <0.001                 | 1.64 | 1.27   | 2.11 | 0.003                     | <0.001                 |
| Fair                                                                                             | Unfavourable | 3.29    | 3.01   | 3.60 | <0.001                    | <0.001                 | 3.28 | 3.00   | 3.60 | <0.001                    | <0.001                 | 2.85 | 2.60   | 3.13 | <0.001                    | <0.001                 |
| Poor                                                                                             | Unfavourable | 6.64    | 5.97   | 7.39 | <0.001                    | <0.001                 | 6.59 | 5.91   | 7.34 | <0.001                    | <0.001                 | 5.11 | 4.57   | 5.72 | <0.001                    | <0.001                 |

Note: HR = hazard ratio; CI = confidence interval; Bonf. = Bonferroni; BH = Benjamini & Hochberg. Model 1 – unadjusted; Model 2 – adjusted for sociodemographic characteristics (excluding sex); Model 3 – additionally adjusted for lifestyle factors.

Supplement figure 7. Survival curve sensitivity analysis

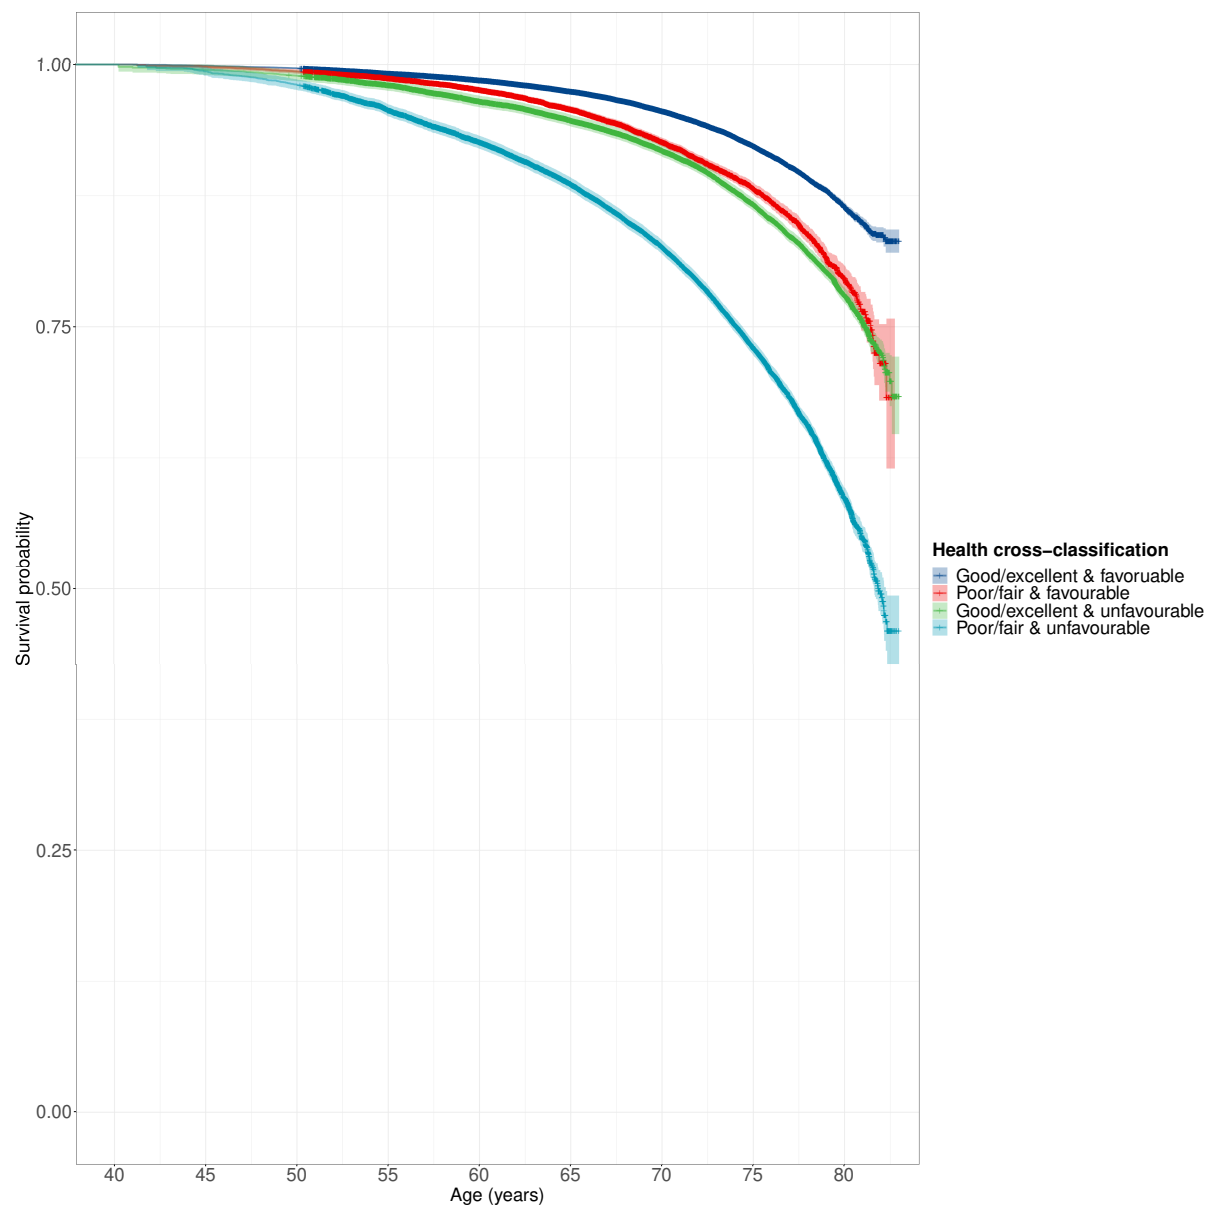

Supplement figure 7. Kaplan-Meier survival probabilities for all-cause mortality. Simplified health cross-classification. 89 observations were above graph maximum of age 83.

Supplement table 7. Hazard ratios all-cause mortality prior to 30 January 2020

| <b>Supplement table 7. Cox proportional hazards model: all-cause mortality prior to 30 January 2020</b> |              |         |        |      |         |        |      |         |        |      |
|---------------------------------------------------------------------------------------------------------|--------------|---------|--------|------|---------|--------|------|---------|--------|------|
| Health cross-classification                                                                             |              | Model 1 |        |      | Model 2 |        |      | Model 3 |        |      |
|                                                                                                         |              | HR      | 95% CI |      | HR      | 95% CI |      | HR      | 95% CI |      |
| Excellent                                                                                               | Favourable   | Ref     | -      | -    | Ref     | -      | -    | Ref     | -      | -    |
| Good                                                                                                    | Favourable   | 1.23    | 1.16   | 1.31 | 1.22    | 1.15   | 1.30 | 1.18    | 1.11   | 1.25 |
| Excellent                                                                                               | Unfavourable | 1.42    | 1.29   | 1.57 | 1.39    | 1.26   | 1.53 | 1.38    | 1.25   | 1.52 |
| Fair                                                                                                    | Favourable   | 1.88    | 1.75   | 2.03 | 1.79    | 1.67   | 1.93 | 1.61    | 1.50   | 1.73 |
| Good                                                                                                    | Unfavourable | 1.87    | 1.76   | 1.99 | 1.81    | 1.70   | 1.92 | 1.73    | 1.63   | 1.84 |
| Poor                                                                                                    | Favourable   | 2.79    | 2.39   | 3.26 | 2.63    | 2.25   | 3.07 | 2.19    | 1.87   | 2.55 |
| Fair                                                                                                    | Unfavourable | 3.32    | 3.12   | 3.52 | 3.08    | 2.89   | 3.27 | 2.78    | 2.61   | 2.95 |
| Poor                                                                                                    | Unfavourable | 7.31    | 6.83   | 7.83 | 6.53    | 6.09   | 7.00 | 5.41    | 5.03   | 5.81 |

*Note:* HR = hazard ratio; CI = confidence interval. Model 1 – unadjusted; Model 2 – adjusted for sociodemographic characteristics; Model 3 – additionally adjusted for lifestyle factors. All Bonferroni-adjusted *P*-values < 0.001.



Supplement table 8. Hazard ratios cause specific mortality prior to 30 January 2020

Results for which statistical significance differed from the main analyses are highlighted (orange = no longer statistically significant, green = statistically significant only in the sensitivity analysis).

| Supplement table 8. Cox proportional hazards model: cause-specific mortality prior to 30 January 2020 |              |         |        |                           |                        |         |        |                           |                        |         |        |                           |                        |       |        |        |
|-------------------------------------------------------------------------------------------------------|--------------|---------|--------|---------------------------|------------------------|---------|--------|---------------------------|------------------------|---------|--------|---------------------------|------------------------|-------|--------|--------|
| Term                                                                                                  |              | Model 1 |        |                           |                        | Model 2 |        |                           |                        | Model 3 |        |                           |                        |       |        |        |
|                                                                                                       |              | HR      | 95% CI | <i>p</i> <sub>Bonf.</sub> | <i>p</i> <sub>BH</sub> | HR      | 95% CI | <i>p</i> <sub>Bonf.</sub> | <i>p</i> <sub>BH</sub> | HR      | 95% CI | <i>p</i> <sub>Bonf.</sub> | <i>p</i> <sub>BH</sub> |       |        |        |
| <b>Ischaemic heart disease</b>                                                                        |              |         |        |                           |                        |         |        |                           |                        |         |        |                           |                        |       |        |        |
| Excellent                                                                                             | Favourable   | Ref     | -      | -                         | -                      | -       | Ref    | -                         | -                      | -       | -      | Ref                       | -                      | -     | -      | -      |
| Good                                                                                                  | Favourable   | 1.17    | 0.98   | 1.39                      | >0.999                 | 0.098   | 1.15   | 0.97                      | 1.38                   | >0.999  | 0.121  | 1.11                      | 0.92                   | 1.32  | >0.999 | 0.268  |
| Excellent                                                                                             | Unfavourable | 1.41    | 1.05   | 1.89                      | 0.454                  | 0.028   | 1.37   | 1.02                      | 1.84                   | 0.736   | 0.043  | 1.35                      | 1.01                   | 1.82  | 0.884  | 0.049  |
| Fair                                                                                                  | Favourable   | 2.09    | 1.69   | 2.58                      | <0.001                 | <0.001  | 1.98   | 1.60                      | 2.45                   | <0.001  | <0.001 | 1.75                      | 1.41                   | 2.17  | <0.001 | <0.001 |
| Good                                                                                                  | Unfavourable | 1.75    | 1.46   | 2.10                      | <0.001                 | <0.001  | 1.69   | 1.41                      | 2.03                   | <0.001  | <0.001 | 1.61                      | 1.34                   | 1.93  | <0.001 | <0.001 |
| Poor                                                                                                  | Favourable   | 3.55    | 2.34   | 5.37                      | <0.001                 | <0.001  | 3.32   | 2.19                      | 5.04                   | <0.001  | <0.001 | 2.69                      | 1.77                   | 4.09  | <0.001 | <0.001 |
| Fair                                                                                                  | Unfavourable | 3.37    | 2.81   | 4.04                      | <0.001                 | <0.001  | 3.12   | 2.59                      | 3.74                   | <0.001  | <0.001 | 2.76                      | 2.29                   | 3.33  | <0.001 | <0.001 |
| Poor                                                                                                  | Unfavourable | 7.39    | 6.04   | 9.06                      | <0.001                 | <0.001  | 6.57   | 5.34                      | 8.09                   | <0.001  | <0.001 | 5.29                      | 4.26                   | 6.56  | <0.001 | <0.001 |
| <b>Cerebrovascular diseases</b>                                                                       |              |         |        |                           |                        |         |        |                           |                        |         |        |                           |                        |       |        |        |
| Excellent                                                                                             | Favourable   | Ref     | -      | -                         | -                      | -       | Ref    | -                         | -                      | -       | -      | Ref                       | -                      | -     | -      | -      |
| Good                                                                                                  | Favourable   | 1.28    | 0.93   | 1.75                      | >0.999                 | 0.136   | 1.28   | 0.93                      | 1.75                   | >0.999  | 0.136  | 1.24                      | 0.90                   | 1.70  | >0.999 | 0.189  |
| Excellent                                                                                             | Unfavourable | 1.78    | 1.10   | 2.89                      | 0.391                  | 0.030   | 1.74   | 1.08                      | 2.82                   | 0.504   | 0.035  | 1.73                      | 1.07                   | 2.80  | 0.557  | 0.035  |
| Fair                                                                                                  | Favourable   | 2.23    | 1.54   | 3.24                      | <0.001                 | <0.001  | 2.17   | 1.50                      | 3.16                   | 0.001   | <0.001 | 1.96                      | 1.34                   | 2.86  | 0.010  | 0.001  |
| Good                                                                                                  | Unfavourable | 2.31    | 1.68   | 3.16                      | <0.001                 | <0.001  | 2.26   | 1.64                      | 3.10                   | <0.001  | <0.001 | 2.17                      | 1.58                   | 2.98  | <0.001 | <0.001 |
| Poor                                                                                                  | Favourable   | 2.63    | 1.13   | 6.15                      | 0.531                  | 0.035   | 2.56   | 1.09                      | 6.00                   | 0.631   | 0.037  | 2.11                      | 0.90                   | 4.96  | >0.999 | 0.100  |
| Fair                                                                                                  | Unfavourable | 4.12    | 3.00   | 5.66                      | <0.001                 | <0.001  | 3.91   | 2.84                      | 5.39                   | <0.001  | <0.001 | 3.53                      | 2.55                   | 4.89  | <0.001 | <0.001 |
| Poor                                                                                                  | Unfavourable | 10.70   | 7.62   | 15.04                     | <0.001                 | <0.001  | 9.82   | 6.94                      | 13.90                  | <0.001  | <0.001 | 7.90                      | 5.51                   | 11.31 | <0.001 | <0.001 |
| <b>Influenza/pneumonia</b>                                                                            |              |         |        |                           |                        |         |        |                           |                        |         |        |                           |                        |       |        |        |
| Excellent                                                                                             | Favourable   | Ref     | -      | -                         | -                      | -       | Ref    | -                         | -                      | -       | -      | Ref                       | -                      | -     | -      | -      |
| Good                                                                                                  | Favourable   | 1.40    | 0.88   | 2.20                      | >0.999                 | 0.227   | 1.35   | 0.85                      | 2.13                   | >0.999  | 0.263  | 1.28                      | 0.81                   | 2.02  | >0.999 | 0.346  |
| Excellent                                                                                             | Unfavourable | 1.51    | 0.72   | 3.18                      | >0.999                 | 0.340   | 1.46   | 0.69                      | 3.06                   | >0.999  | 0.357  | 1.44                      | 0.68                   | 3.02  | >0.999 | 0.357  |
| Fair                                                                                                  | Favourable   | 1.64    | 0.91   | 2.94                      | >0.999                 | 0.158   | 1.49   | 0.83                      | 2.69                   | >0.999  | 0.255  | 1.31                      | 0.72                   | 2.37  | >0.999 | 0.371  |
| Good                                                                                                  | Unfavourable | 2.55    | 1.62   | 4.02                      | 0.001                  | <0.001  | 2.38   | 1.50                      | 3.76                   | 0.004   | 0.001  | 2.24                      | 1.42                   | 3.55  | 0.012  | 0.001  |
| Poor                                                                                                  | Favourable   | 5.63    | 2.29   | 13.85                     | 0.003                  | <0.001  | 4.98   | 2.02                      | 12.30                  | 0.011   | 0.001  | 4.06                      | 1.63                   | 10.09 | 0.054  | 0.005  |
| Fair                                                                                                  | Unfavourable | 3.23    | 2.01   | 5.20                      | <0.001                 | <0.001  | 2.84   | 1.75                      | 4.59                   | <0.001  | <0.001 | 2.50                      | 1.54                   | 4.07  | 0.005  | 0.001  |
| Poor                                                                                                  | Unfavourable | 8.63    | 5.16   | 14.45                     | <0.001                 | <0.001  | 7.17   | 4.24                      | 12.13                  | <0.001  | <0.001 | 5.86                      | 3.41                   | 10.07 | <0.001 | <0.001 |
| <b>Dementia/Alzheimer's disease</b>                                                                   |              |         |        |                           |                        |         |        |                           |                        |         |        |                           |                        |       |        |        |
| Excellent                                                                                             | Favourable   | Ref     | -      | -                         | -                      | -       | Ref    | -                         | -                      | -       | -      | Ref                       | -                      | -     | -      | -      |
| Good                                                                                                  | Favourable   | 1.26    | 0.91   | 1.75                      | >0.999                 | 0.253   | 1.25   | 0.90                      | 1.74                   | >0.999  | 0.265  | 1.20                      | 0.86                   | 1.67  | >0.999 | 0.313  |
| Excellent                                                                                             | Unfavourable | 1.39    | 0.81   | 2.40                      | >0.999                 | 0.291   | 1.35   | 0.78                      | 2.34                   | >0.999  | 0.313  | 1.33                      | 0.77                   | 2.30  | >0.999 | 0.318  |
| Fair                                                                                                  | Favourable   | 1.37    | 0.88   | 2.12                      | >0.999                 | 0.253   | 1.31   | 0.84                      | 2.04                   | >0.999  | 0.291  | 1.17                      | 0.75                   | 1.83  | >0.999 | 0.483  |
| Good                                                                                                  | Unfavourable | 1.95    | 1.39   | 2.73                      | 0.002                  | <0.001  | 1.88   | 1.34                      | 2.64                   | 0.005   | 0.001  | 1.79                      | 1.28                   | 2.51  | 0.016  | 0.002  |
| Poor                                                                                                  | Favourable   | 3.37    | 1.52   | 7.48                      | 0.058                  | 0.006   | 3.26   | 1.47                      | 7.26                   | 0.079   | 0.007  | 2.69                      | 1.21                   | 6.03  | 0.332  | 0.028  |
| Fair                                                                                                  | Unfavourable | 3.20    | 2.27   | 4.50                      | <0.001                 | <0.001  | 2.99   | 2.12                      | 4.22                   | <0.001  | <0.001 | 2.66                      | 1.88                   | 3.77  | <0.001 | <0.001 |
| Poor                                                                                                  | Unfavourable | 6.79    | 4.61   | 9.99                      | <0.001                 | <0.001  | 6.18   | 4.17                      | 9.17                   | <0.001  | <0.001 | 5.04                      | 3.35                   | 7.58  | <0.001 | <0.001 |
| <b>Chronic lower respiratory disease</b>                                                              |              |         |        |                           |                        |         |        |                           |                        |         |        |                           |                        |       |        |        |
| Excellent                                                                                             | Favourable   | Ref     | -      | -                         | -                      | -       | Ref    | -                         | -                      | -       | -      | Ref                       | -                      | -     | -      | -      |
| Good                                                                                                  | Favourable   | 1.40    | 0.99   | 1.99                      | >0.999                 | 0.065   | 1.37   | 0.96                      | 1.94                   | >0.999  | 0.084  | 1.34                      | 0.95                   | 1.91  | >0.999 | 0.099  |
| Excellent                                                                                             | Unfavourable | 2.16    | 1.30   | 3.60                      | 0.062                  | 0.005   | 2.12   | 1.27                      | 3.52                   | 0.080   | 0.006  | 2.08                      | 1.25                   | 3.46  | 0.102  | 0.007  |
| Fair                                                                                                  | Favourable   | 2.27    | 1.50   | 3.44                      | 0.002                  | <0.001  | 2.09   | 1.38                      | 3.18                   | 0.011   | 0.001  | 1.95                      | 1.28                   | 2.97  | 0.041  | 0.003  |
| Good                                                                                                  | Unfavourable | 2.18    | 1.53   | 3.11                      | <0.001                 | <0.001  | 2.09   | 1.46                      | 2.99                   | 0.001   | <0.001 | 2.02                      | 1.41                   | 2.89  | 0.003  | <0.001 |
| Poor                                                                                                  | Favourable   | 3.27    | 1.39   | 7.74                      | 0.144                  | 0.009   | 2.93   | 1.24                      | 6.94                   | 0.309   | 0.018  | 2.55                      | 1.07                   | 6.07  | 0.722  | 0.040  |
| Fair                                                                                                  | Unfavourable | 3.87    | 2.71   | 5.54                      | <0.001                 | <0.001  | 3.51   | 2.44                      | 5.04                   | <0.001  | <0.001 | 3.25                      | 2.25                   | 4.68  | <0.001 | <0.001 |
| Poor                                                                                                  | Unfavourable | 7.45    | 4.96   | 11.20                     | <0.001                 | <0.001  | 6.49   | 4.28                      | 9.82                   | <0.001  | <0.001 | 5.65                      | 3.68                   | 8.66  | <0.001 | <0.001 |
| <b>Malignant neoplasm</b>                                                                             |              |         |        |                           |                        |         |        |                           |                        |         |        |                           |                        |       |        |        |
| Excellent                                                                                             | Favourable   | Ref     | -      | -                         | -                      | -       | Ref    | -                         | -                      | -       | -      | Ref                       | -                      | -     | -      | -      |
| Good                                                                                                  | Favourable   | 1.23    | 1.13   | 1.33                      | <0.001                 | <0.001  | 1.22   | 1.12                      | 1.32                   | <0.001  | <0.001 | 1.18                      | 1.08                   | 1.28  | 0.003  | <0.001 |
| Excellent                                                                                             | Unfavourable | 1.31    | 1.14   | 1.51                      | 0.003                  | <0.001  | 1.28   | 1.11                      | 1.47                   | 0.012   | 0.001  | 1.27                      | 1.10                   | 1.46  | 0.019  | 0.001  |
| Fair                                                                                                  | Favourable   | 1.85    | 1.67   | 2.05                      | <0.001                 | <0.001  | 1.77   | 1.60                      | 1.96                   | <0.001  | <0.001 | 1.59                      | 1.44                   | 1.76  | <0.001 | <0.001 |
| Good                                                                                                  | Unfavourable | 1.86    | 1.70   | 2.02                      | <0.001                 | <0.001  | 1.80   | 1.65                      | 1.96                   | <0.001  | <0.001 | 1.73                      | 1.58                   | 1.88  | <0.001 | <0.001 |
| Poor                                                                                                  | Favourable   | 2.36    | 1.87   | 2.97                      | <0.001                 | <0.001  | 2.23   | 1.76                      | 2.81                   | <0.001  | <0.001 | 1.86                      | 1.47                   | 2.35  | <0.001 | <0.001 |
| Fair                                                                                                  | Unfavourable | 3.28    | 3.01   | 3.57                      | <0.001                 | <0.001  | 3.05   | 2.80                      | 3.33                   | <0.001  | <0.001 | 2.76                      | 2.53                   | 3.01  | <0.001 | <0.001 |
| Poor                                                                                                  | Unfavourable | 7.12    | 6.47   | 7.84                      | <0.001                 | <0.001  | 6.37   | 5.78                      | 7.02                   | <0.001  | <0.001 | 5.30                      | 4.79                   | 5.86  | <0.001 | <0.001 |

Note: HR = hazard ratio; CI = confidence interval; Bonf. = Bonferroni; BH = Benjamini & Hochberg. Model 1 – unadjusted; Model 2 – adjusted for sociodemographic characteristics; Model 3 – additionally adjusted for lifestyle factors.
